# Supplementary material
Source: PubMed Central journal article supplement (PMC8861804)
Supplement: sj-pdf-2-dst-10.1177_1932296821997921.pdf [file sj-pdf-2-dst-10.1177_1932296821997921.pdf]

| <b>Author (Year), Journal</b>                                                   | <b>Selection (max 5)</b>                        | <b>Comparability (max 2)</b> | <b>Outcome (max 3)</b> | <b>NOAS TOTAL</b> |
|---------------------------------------------------------------------------------|-------------------------------------------------|------------------------------|------------------------|-------------------|
| <i>Postural balance</i>                                                         |                                                 |                              |                        |                   |
| G. G. Simoneau<br>(1994)<br>Diabetes Care                                       | 1)a,b,c,d<br>2)a,b,c<br>3)a*,b,c<br>4)a**,b,c   | 1)a**,b                      | 1)a,b,c, d<br>2)a*,b   | <b>6</b>          |
| P. Boucher<br>(1995)<br>Diabetes Care                                           | 1)a,b*,c,d<br>2)a,b,c<br>3)a,b,c<br>4)a**,b,c   | 1)a,b                        | 1)a,b,c,d<br>2)a,b     | <b>3</b>          |
| L. Uccioli<br>(1995)<br>Diabetes Care                                           | 1)a,b,c,d<br>2)a,b,c<br>3)a*,b,c<br>4)a**,b,c   | 1)a**,b                      | 1)a,b, c*,d<br>2)a*,b  | <b>7</b>          |
| J.B. Dingwell<br>(1999)<br>Gait and Posture                                     | 1)a,b,c,d<br>2)a,b,c<br>3)a*,b,c<br>4)a**,b,c   | 1)a**,b                      | 1)a,b,c,d<br>2)a*,b    | <b>6</b>          |
| H. Corriveau<br>(2000)<br>Diabetes care                                         | 1)a,b,c,d<br>2)a*,b, c<br>3)a*,b,c<br>4)a**,b,c | 1)a**,b                      | 1)a,b**,c,d<br>2)a*,b  | <b>8</b>          |
| R. Yamamoto<br>(2001)<br>Diabetes Research and<br>Clinical Practice             | 1)a,b,c,d<br>2)a,b,c<br>3)a**,b,c<br>4)a**,b,c  | 1)a**,b                      | 1)a,b**,c,d<br>2)a*,b  | <b>7</b>          |
| H.E Resnick<br>(2002)<br>Muscle & Nerve                                         | 1)a,b,c,d<br>2)a,b,c<br>3)a*,b,c<br>4)a**,b,c   | 1)a**,b                      | 1)a,b,c,d<br>2)a*,b    | <b>6</b>          |
| A. Nardone<br>(2003)<br>International Federation of<br>Clinical Neurophysiology | 1)a,b,c,d<br>2)a,b,c<br>3)a*,b,c<br>4)a**,b,c   | 1)a,b                        | 1)a,b c, d<br>2)a*,b   | <b>4</b>          |
| H.B. Menz<br>(2004)<br>Arch Phys Med Rehabil                                    | 1)a,b,c,d<br>2)a,b,c<br>3)a,b,c<br>4)a**,b,c    | 1)a,b                        | 1)a,b**,c,d<br>2)a*,b  | <b>5</b>          |
| A. Cimbiz                                                                       | 11)a,b*,c,d                                     | 1)a**,b                      | 1)a,b,c*,d             | <b>8</b>          |

|                                                                          |                                                 |         |                       |          |
|--------------------------------------------------------------------------|-------------------------------------------------|---------|-----------------------|----------|
| (2004)<br>Journal of Diabetes and Its Complications                      | 2)a,b,c<br>3)a*,b,c<br>4)a**,b,c                |         | 2)a*,b                |          |
| Z. Sawacha<br>(2008)<br>Clinical Biomechanics                            | 1)a,b,c,d<br>2)a*,b,c<br>3)a*,b,c<br>4)a,b,c    | 1)a,b   | 1)a,b,c,d<br>2)a*,b   | <b>3</b> |
| R. J. Schilling<br>(2009)<br>Transactions on Biomedical Engineering      | 1)a,b,c,d<br>2)a,b,c<br>3)a*,b,c<br>4)a**,b,c   | 1)a,b   | 1)a,b**,c,d<br>2)a*,b | <b>6</b> |
| <b>A. A. Emam<br/>(2009)<br/>Singapore Med J</b>                         | 1)a*,b,c,d<br>2)a*,b,c<br>3)a*,b,c<br>4)a**,b,c | 1)a**,b | 1)a,b,c,d<br>2)a*,b   | <b>8</b> |
| G.D Fulk<br>(2010)<br>Journal of Neuro Engineering and Rehabilitation    | 1)a,b*,c,d<br>2)a,b,c<br>3)a*,b,c<br>4)a**,b,c  | 1)a,b   | 1)a,b**,c,d<br>2)a*,b | <b>7</b> |
| A.N. Onodera<br>(2011)<br>Muscle & Nerve                                 | 1)a,b,c,d<br>2)a,b,c<br>3)a*,b,c<br>4)a**,b,c   | 1)a,b   | 1)a,b,c*,d<br>2)a*,b  | <b>5</b> |
| T. Ghanavati<br>(2011)<br>Diabetes Research and Clinical Practice        | 1)a,b,c,d<br>2)a,b,c<br>3)a*,b,c<br>4)a**,b,c   | 1) a,b  | 1)a,b**,c,d<br>2)a,b  | <b>5</b> |
| <b>L. Allet<br/>(2012)<br/>Muscle &amp; Nerve</b>                        | 1)a,b,c,d<br>2)a,b,c<br>3)a*,b,c<br>4)a**,b,c   | 1)a**,b | 1)a,b,c*,d<br>2)a*,b  | <b>7</b> |
| <b>P. Lalli<br/>(2013)<br/>Journal of Diabetes and its Complications</b> | 1)a,b,c,d<br>2)a,b,c<br>3)a*,b,c<br>4)a,b,c     | 1)a**,b | 1)a,b,c,d<br>2)a*,b   | <b>4</b> |
| T. Melai<br>(2013)<br>Human Movement Science                             | 1)a,b,c,d<br>2)a,b,c<br>3)a*,b,c<br>4)a**,b,c   | 1)a,b   | 1)a,b,c,d<br>2)a*,b   | <b>4</b> |
| C. Kelly                                                                 | 1)a,b,c,d                                       | 1)a,b   | 1)a,b**,c,d           | <b>6</b> |

|                                                                                            |                                               |         |                       |          |
|--------------------------------------------------------------------------------------------|-----------------------------------------------|---------|-----------------------|----------|
| (2013)<br>Journal of the American<br>Podiatric Medical Association                         | 2)a,b,c<br>3)a*,b,c<br>4)a**,b,c              |         | 2)a*,b                |          |
| F.H. Palma<br>(2013)<br>Arq Bras Endocrinol Metab.                                         | 1)a,b,c,d<br>2)a,b,c<br>3)a*,b,c<br>4)a**,b,c | 1)a,b   | 1)a**,b,c,d<br>2)a*,b | <b>6</b> |
| M.M. Vaz<br>(2013)<br>Archives of Physical Medicine<br>and Rehabilitation                  | 1)a,b,c,d<br>2)a,b,c<br>3)a*,b,c<br>4)a**,b,c | 1)a,b   | 1)a,b**,c,d<br>2)a,b  | <b>5</b> |
| I. M. Fahmy<br>(2014)<br>J Neurol Psychiat Neurosurg                                       | 1)a,b,c,d<br>2)a,b,c<br>3)a*,b,c<br>4)a**,b,c | 1)a**,b | 1)a**,b,c,d<br>2)a*,b | <b>8</b> |
| E. Maranesi,<br>(2014)<br>Gait & Posture                                                   | 1)a,b,c,d<br>2)a,b,c<br>3)a*,b,c<br>4)a**,b,c | 1)a,b   | 1)a,b,c,d<br>2)a*,b   | <b>4</b> |
| J.C. Handsaker<br>(2014)<br>Diabetes Care                                                  | 1)a,b,c,d<br>2)a,b,c<br>3)a*,b,c<br>4)a**,b,c | 1)a**,b | 1)a,b,c,d<br>2)a*,b   | <b>6</b> |
| L. Allet<br>(2014)<br>Journal of Diabetes and its<br>Complications                         | 1)a,b,c,d<br>2)a,b,c<br>3)a*,b,c<br>4)a**,b,c | 1)a**,b | 1)a,b,c*,d<br>2)a*,b  | <b>7</b> |
| S.J. Brown<br>(2014)<br>Journal of Biomechanics                                            | 1)a,b,c,d<br>2)a,b,c<br>3)a*,b,c<br>4)a**,b,c | 1)a**,b | 1)a,b,c,d<br>2)a*,b   | <b>6</b> |
| S. J. Brown<br>(2015)<br>Diabetes Care                                                     | 1)a,b,c,d<br>2)a,b,c<br>3)a*,b,c<br>4)a**,b,c | 1)a,b   | 1)a**,b,c,d<br>2)a*,b | <b>6</b> |
| M.R. Camargo<br>(2015)<br>Diabetes & metabolic<br>Syndrome: Clinical Research<br>& Reviews | 1)a,b,c,d<br>2)a,b,c<br>3)a*,b,c<br>4)a**,b,c | 1)a**,b | 1)a,b**,c,d<br>2)a*,b | <b>8</b> |

|                                                                                                    |                                                |         |                       |          |
|----------------------------------------------------------------------------------------------------|------------------------------------------------|---------|-----------------------|----------|
| <b>N. Toosizadeh<br/>(2015)<br/>PLOS ONE</b>                                                       | 1)a,b,c,d<br>2)a,b,c<br>3)a*,b,c<br>4)a**,b,c  | 1)a**,b | 1)a,b,c,d<br>2)a*,b   | <b>6</b> |
| J. C. Handsaker<br>(2015)<br>Diabetic Medicine                                                     | 1)a,b,c,d<br>2)a,b,c<br>3)a*,b,c<br>4)a**,b,c  | 1)a**,b | 1)a,b,c,d<br>2)a*,b   | <b>6</b> |
| B. Timar<br>(2016)<br>PLOS ONE                                                                     | 1)a*,b,c,d<br>2)a*,b,c<br>3)a,b,c<br>4)a**,b,c | 1)a**,b | 1)a,b*,c*,d<br>2)a*,b | <b>8</b> |
| F. Spolaor,<br>(2016)<br>Journal of Electromyography<br>and Kinesiology                            | 1)a,b,c,d<br>2)a,b,c<br>3)a*,b,c<br>4)a**,b,c  | 1)a,b   | 1)a,b,c,d<br>2)a*,b   | <b>4</b> |
| <b>K. Zuraes<br/>(2016)<br/>American Journal of<br/>Physical<br/>Medicine &amp; Rehabilitation</b> | 1)a,b,c,d<br>2)a,b,c<br>3)a*,b,c<br>4)a,b*,c   | 1)a**,b | 1)a**,b,c,d<br>2)a*,b | <b>7</b> |
| <b>T. Riandini<br/>(2018)<br/>Acta Diabetologica</b>                                               | 1)a,b*,c,d<br>2)a*,b,c<br>3)a,b,c<br>4)a,b*,c  | 1)a**,b | 1)a**,b,c,d<br>2)a*,b | <b>8</b> |
| <b>J.K. Richardson,<br/>(2017)<br/>Am J Phys Med Rehabil</b>                                       | 1)a,b,c,d<br>2)a,b,c<br>3)a*,b,c<br>4)a**,b,c  | 1)a**,b | 1)a**,b,c,d<br>2)a*,b | <b>8</b> |
| Eneida Yuri Sudaá,<br>(2019)<br>Gait & Posture                                                     | 1)a,b,c,d<br>2)a,b,c<br>3)a*,b,c<br>4)a**,b,c  | 1)a,b   | 1)a,b,c,d<br>2)a*,b   | <b>4</b> |
| <b><i>Fall accidents</i></b>                                                                       |                                                |         |                       |          |
| P.R. Cavanagh<br>(1992)<br>Diabetic Medicine                                                       | 1)a,b*,c,d<br>2)a,b,c<br>3)a,b,c<br>4)a,b*,c   | 1)a**,b | 1)a,b,c*,d<br>2)a*,b  | <b>6</b> |

|                                                                                                     |                                               |         |                      |          |
|-----------------------------------------------------------------------------------------------------|-----------------------------------------------|---------|----------------------|----------|
|                                                                                                     |                                               |         |                      |          |
| <b>A. A Emam<br/>(2009)<br/>Singapore Med J</b>                                                     | 1)a*,b,c,d<br>2)a*,b,c<br>3)a*,b,c<br>4)a,b,c | 1)a**,b | 1)a,b,c,d<br>2)a*,b  | <b>6</b> |
| P. Lalli<br>(2013)<br>Journal of Diabetes and its<br>Complications                                  | 1)a,b,c,d<br>2)a,b,c<br>3)a*,b,c<br>4)a,b,c   | 1)a**,b | 1)a,b,c*,d<br>2)a*,b | <b>5</b> |
| <b>M.M. Vaz<br/>(2013)<br/>Archives of Physical<br/>Medicine and Rehabilitation</b>                 | 1)a,b,c,d<br>2)a,b,c<br>3)a*,b,c<br>4)a,b,c   | 1)a,b   | 1)a,b**,c,d<br>2)a,b | <b>3</b> |
| <b>L. Allet<br/>(2014)<br/>Journal of Diabetes and its<br/>Complications</b>                        | 1)a,b*,c,d<br>2)a,b,c<br>3)a,b,c<br>4)a,b,c   | 1)a**,b | 1)a,b,c*,d<br>2)a*,b | <b>5</b> |
| J.K. Richardson<br>(2014)<br>Muscle Nerve                                                           | 1)a,b,c,d<br>2)a,b,c<br>3)a*,b,c<br>4)a,b*,c  | 1)a**,b | 1)a,b,c*,d<br>2)a*,b | <b>6</b> |
| <b>N. Toosizadeh,<br/>(2015)<br/>PLOS ONE</b>                                                       | 1)a,b,c,d<br>2)a,b,c<br>3)a*,b,c<br>4)a,b,c   | 1)a**,b | 1)a,b,c*,d<br>2)a*,b | <b>5</b> |
| <b>K. Zurales<br/>(2016)<br/>American Journal of<br/>Physical<br/>Medicine &amp; Rehabilitation</b> | 1)a,b,c,d<br>2)a,b,c<br>3)a*,b,c<br>4)a,b*,c  | 1)a**,b | 1)a,b,c*,d<br>2)a*,b | <b>6</b> |
| V. Bokan-Mirković<br>(2017)<br>Acta Clin Croat                                                      | 1)a,b,c,d<br>2)a,b,c<br>3)a*,b,c<br>4)a,b,c   | 1)a**,b | 1)a,b,c*,d<br>2)a*,b | <b>5</b> |
| <b>J.K. Richardson,<br/>(2017)<br/>Am J Phys Med Rehabil</b>                                        | 1)a,b,c,d<br>2)a,b,c<br>3)a*,b,c<br>4)a,b*,c  | 1)a**,b | 1)a,b,c*,d<br>2)a*,b | <b>6</b> |
| <i>Activities of daily living</i>                                                                   |                                               |         |                      |          |

|                                                                  |                                                                                    |                   |                                          |          |
|------------------------------------------------------------------|------------------------------------------------------------------------------------|-------------------|------------------------------------------|----------|
| L. Vileikyte<br>(2005)<br>Diabetes Care                          | 1) <b>a</b> *,b,c,d<br>2)a, <b>b</b> ,c<br>3)a,b, <b>c</b><br>4) <b>a</b> ***,b,c  | 1) <b>a</b> ***,b | 1)a, <b>b</b> ***,c,d<br>2) <b>a</b> *,b | <b>8</b> |
| L. Vileikyte<br>(2009)<br>Diabetologia                           | 1) <b>a</b> *,b,c,d<br>2)a, <b>b</b> ,c<br>3)a,b, <b>c</b><br>4) <b>a</b> ***,b,c  | 1) <b>a</b> ***,b | 1)a, <b>b</b> ***,c,d<br>2) <b>a</b> *,b | <b>8</b> |
| <b>T. Riandini</b><br><b>(2018)</b><br><b>Acta Diabetologica</b> | 1)a, <b>b</b> *,c,d<br>2) <b>a</b> *,b,c<br>3)a,b, <b>c</b><br>4) <b>a</b> ***,b,c | 1) <b>a</b> ***,b | 1) <b>a</b> ***,b,c,d<br>2) <b>a</b> *,b | <b>9</b> |

**Table S2. Newcastle-Ottawa Scale for cross-sectional studies**

The scale has been adapted from the Newcastle-Ottawa Quality Assessment Scale for cohort studies to provide quality assessment of cross sectional studies. Very good studies 9-10 points; Good Studies: 7-8 points; Satisfactory Studies: 5-6 points; Unsatisfactory Studies: 0 to 4 points (score marked with a red color). Studies were divided and assessed separately for the three outcomes: postural balance, fall accidents and activities of daily living. If a study assessed two or more of the variables the study was reassessed for each variable within each category. Studies marked with bold were assessed for more than one outcome. Selection: 1) representation of the sample, 2) sample size, 3) Non-responders, 4) Ascertainment of exposure; Comparability: 1) Comparability of cases and controls (confounding); Outcome: 1) Assessment of the outcome, 2) statistical tests.
